# Supplementary material for: Cdx2 homeoprotein inhibits non-homologous end joining in colon cancer but not in leukemia cells
Source: PubMed Central journal article supplement — Nucleic Acids Res. 2011 Dec 21;40(8):3456–69. doi: 10.1093/nar/gkr1242 (PMC3333856; doi:10.1093/nar/gkr1242), 2011-12-21
Supplement: supp_gkr1242_nar-02815-d-2011-File009.pdf [file supp_gkr1242_nar-02815-d-2011-File009.pdf]

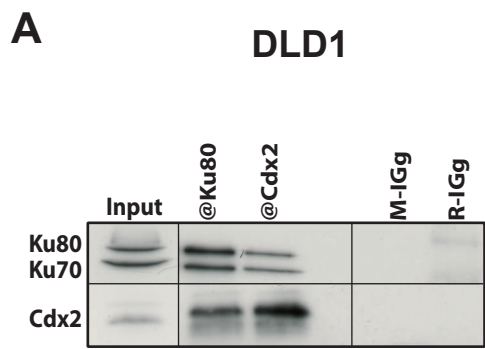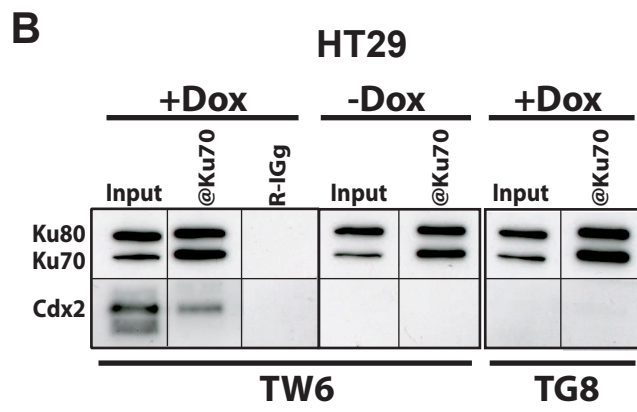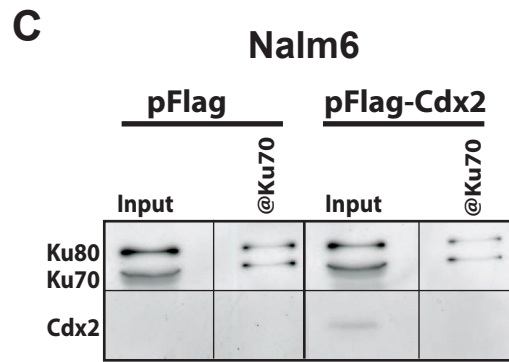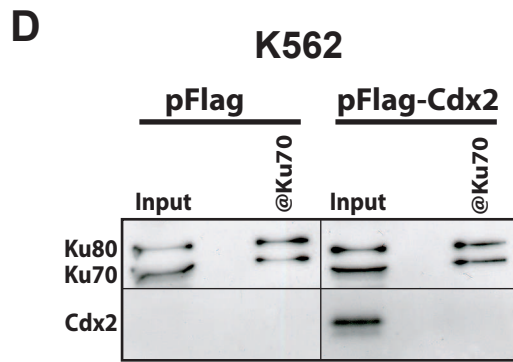

Supplementary Figure 1

**Supplementary Figure 1. Co-immunoprecipitation of Cdx2 and Ku protein in different intestinal or leukemic cell lines.** (A) Endogenous Cdx2 and Ku proteins co-immunoprecipitate in DLD1 cells. Co-IP were performed using rabbit anti-Ku80 or mouse anti-Cdx2 antibodies. Western blot were revealed using anti-Ku antibodies (upper panel) or anti-Cdx2 antibody (lower panel). Rabbit or mouse IgG were used as control. (B) Cdx2 and Ku proteins co-immunoprecipitate in HT29 cells. When indicated (+/- Dox), Cdx2 or GFP expression was induced by Doxycycline treatment of TW6 cells or TG8 control cells respectively, and co-immunoprecipitation were performed using rabbit anti-Ku70 antibody. Western blot were revealed using anti-Ku antibodies (upper panel) or anti-Cdx2 antibody (lower panel). Rabbit IgG were used as negative controls. (C) and (D) Cdx2 and Ku proteins do not interact in leukemic cells. Nalm6 or K562 were transfected with pFlag or pFlag-Cdx2 expression plasmids and co-immunoprecipitation were performed using rabbit anti-Ku70 antibody. Western blot were revealed using anti-Ku antibodies (upper panel) or anti-Flag antibody (lower panel).
